# Supplementary material for: The Development of Neuroendocrine Disturbances over Time: Longitudinal Findings in Patients after Traumatic Brain Injury and Subarachnoid Hemorrhage
Source: MDPI journal article supplement (doi:10.3390/ijms17010002), 2015-12-22
Supplement: s1 [file s1]

# Supplementary Materials: The Development of Neuroendocrine Disturbances over Time: Longitudinal Findings in Patients after Traumatic Brain Injury and Subarachnoid Hemorrhage

Anna Kopczak, Carmen Krewer, Manfred Schneider, Ilonka Kreitschmann-Andermahr, Harald Jörn Schneider and Günter Karl Stalla

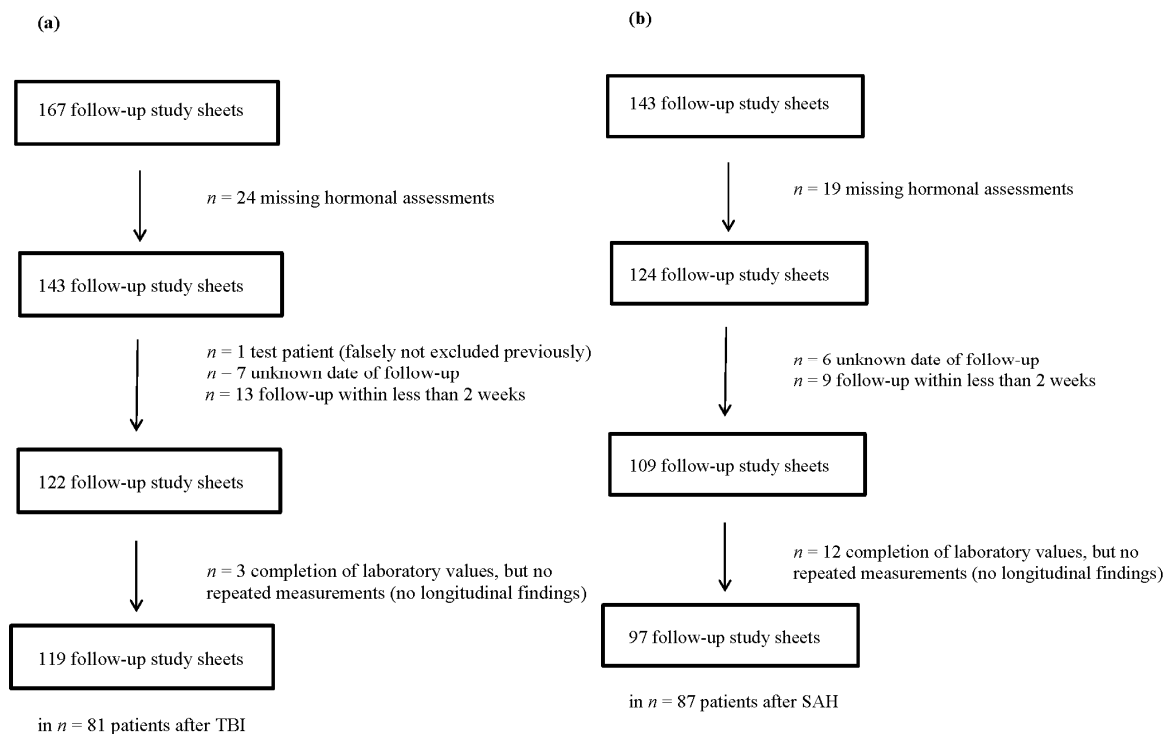

**Figure S1.** Follow-up study sheets in patients after traumatic brain injury (TBI) (a) and after subarachnoid hemorrhage (SAH); (b) included in the Structured Data Assessment of Hypopituitarism.
